# Supplementary material for: Cross-modal perception of identity by sound and taste in bottlenose dolphins
Source: PubMed Central journal article supplement — Sci Adv. 2022 May 18;8(20):eabm7684. doi: 10.1126/sciadv.abm7684 (PMC9116882; doi:10.1126/sciadv.abm7684), 2022-05-18
Supplement: sciadv.abm7684_sm.pdf [file sciadv.abm7684_sm.pdf]

Supplementary Materials for  
**Cross-modal perception of identity by sound and taste in bottlenose dolphins**

Jason N. Bruck\*, Sam F. Walmsley, Vincent M. Janik\*

\*Corresponding author. Email: [jason.bruck@sfasu.edu](mailto:jason.bruck@sfasu.edu) (J.N.B.); [vj@st-andrews.ac.uk](mailto:vj@st-andrews.ac.uk) (V.M.J.)

Published 18 May 2022, *Sci. Adv.* **8**, eabm7684 (2022)  
DOI: [10.1126/sciadv.abm7684](https://doi.org/10.1126/sciadv.abm7684)

**This PDF file includes:**

Figs. S1 to S3  
Tables S1 to S4

Dolphin responses to water vs. urine

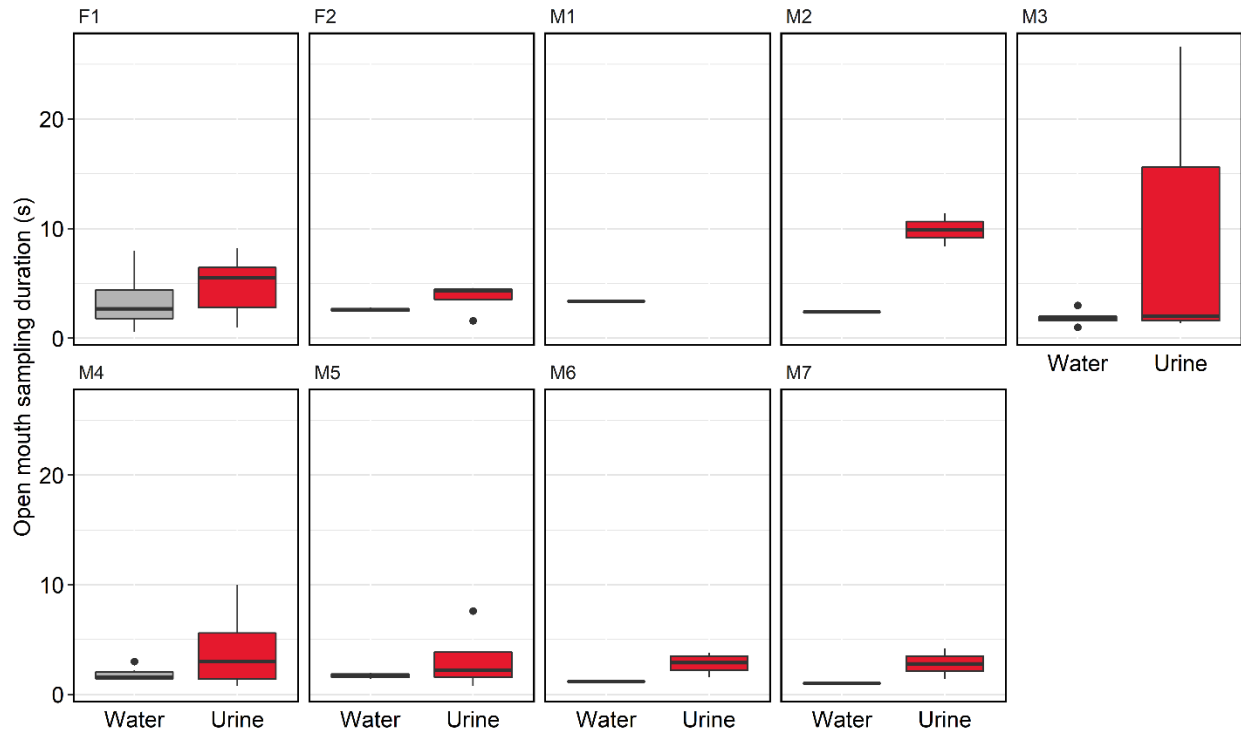

**Fig. S1.**

Variation in the duration of *T. truncatus* open-mouth sampling of water ( $n = 33$ ) or a conspecific's urine ( $n = 33$ ). Each facet shows results from a single animal. One individual (M1) was only presented with water. M= male, F = female

Dolphin responses to unfamiliar vs. familiar urine

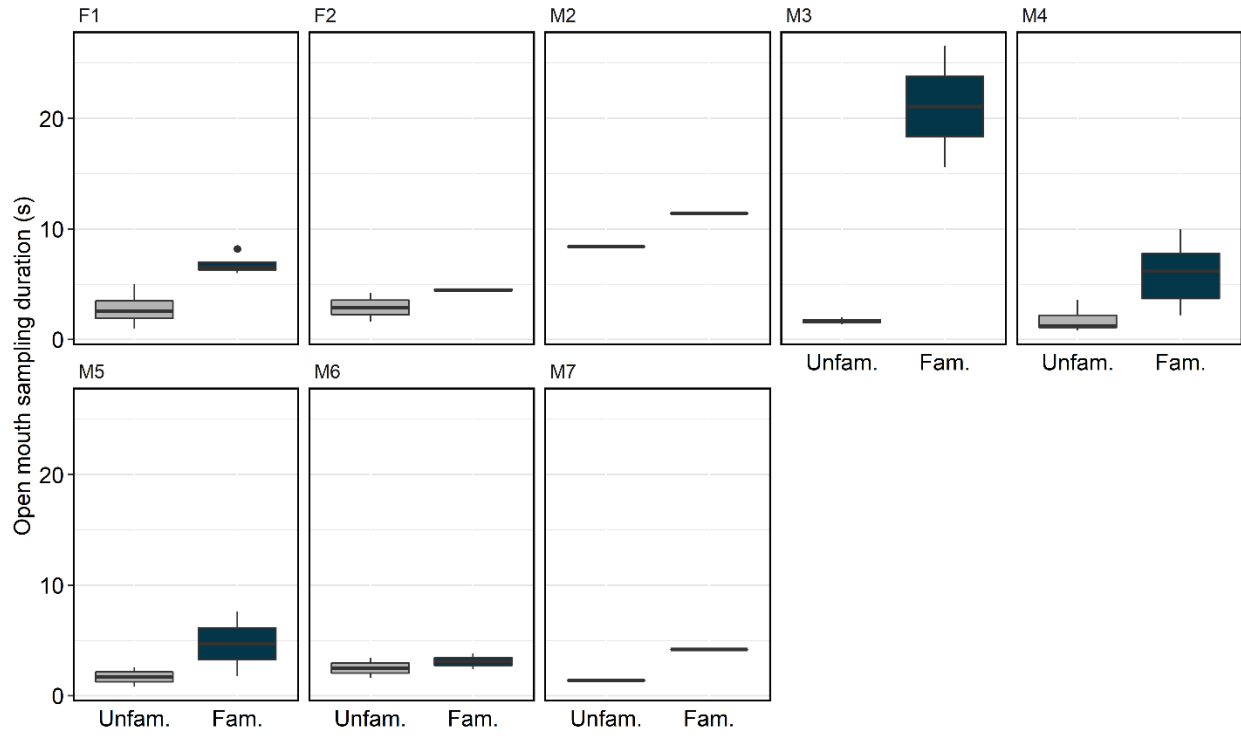

**Fig. S2.**

Variation in the duration of *T. truncatus* open-mouth sampling of urine from an unfamiliar ( $n = 22$ ) conspecific, or a familiar one ( $n = 21$ ). Each facet shows results from a single animal. M= male, F = female

### Dolphin responses to cross-modal identity cues

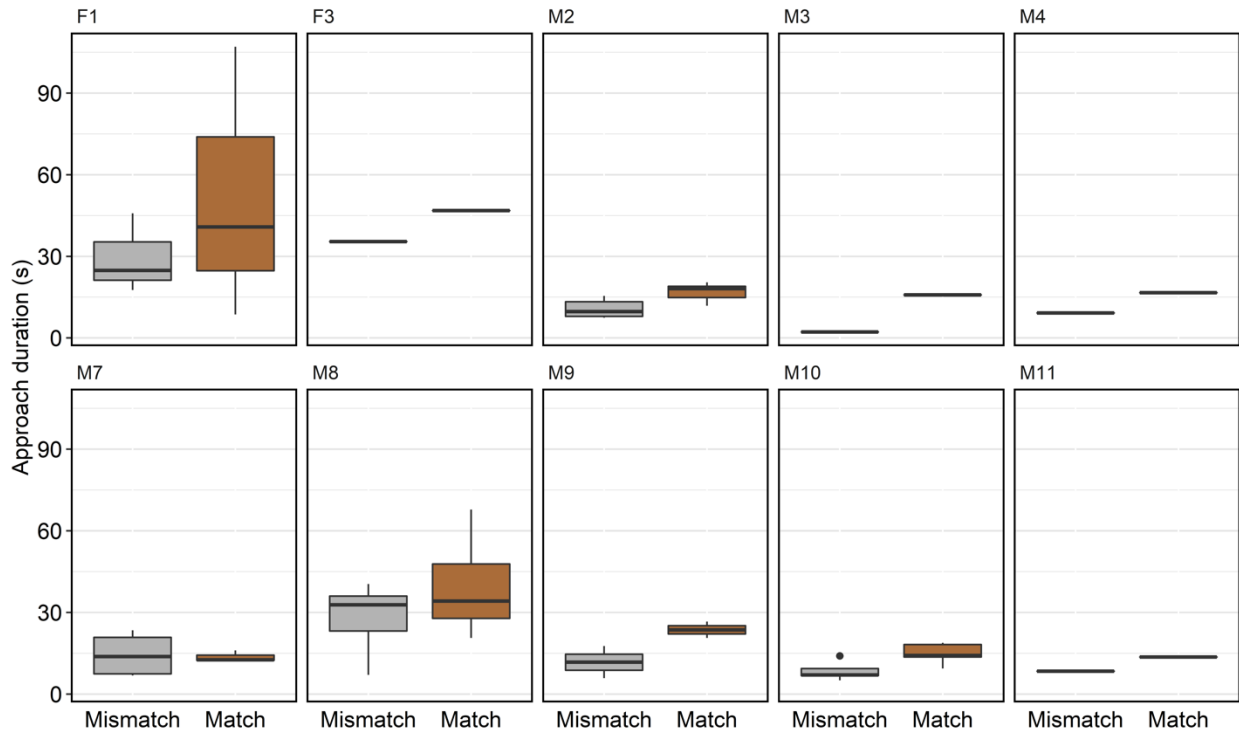

**Fig. S3.**

Variation in the amount of time that *T. truncatus* approaches and explores a speaker following a mismatched ( $n = 37$ ) or matched presentation ( $n = 36$ ) of cross-modal identity cues. Acoustic cues consisted of signature whistles and chemical cues consisted of urine. Each facet shows results from a single animal. M= male, F = female.

**Table S1.**

Complete details of individual dolphins involved in study, both as subjects and donors of urine and acoustic samples. DQB = Dolphin Quest Bermuda, DQH = Dolphin Quest Hawaii, DQO = Dolphin Quest Oahu

| Dolphin identity | Facility | Sex | Age | Subject | Urine Donor (familiarity) | Urine Donor (cross-modal) | Acoustics Donor | Urine received in familiarity tests:<br>Dolphin ID (number of tests)                        | Urine received in cross-modal tests: Dolphin ID (number of tests) | Acoustics received in cross-modal tests: Dolphin ID (number of tests) |
|------------------|----------|-----|-----|---------|---------------------------|---------------------------|-----------------|---------------------------------------------------------------------------------------------|-------------------------------------------------------------------|-----------------------------------------------------------------------|
| F1               | DQH      | F   | 9   | Yes     | Yes                       | Yes                       | Yes             | M2 (2), M10 (1), M11 (2), M7 (2), M4 (1)                                                    | F2 (3), F12 (2), M5 (1)                                           | F14 (1), F12 (2), F2 (2), M5 (1)                                      |
| F2               | DQH      | F   | 6   | Yes     | Yes                       | Yes                       | Yes             | M7 (1), M11 (2), M6 (1)                                                                     |                                                                   |                                                                       |
| F3               | DQB      | F   | 4   | Yes     | No                        | No                        | No              |                                                                                             | F7 (1), F4 (1)                                                    | F9 (1), F4 (1)                                                        |
| M1               | DQH      | M   | 17  |         | Yes                       | No                        | No              |                                                                                             |                                                                   |                                                                       |
| M2               | DQO      | M   | 32  | Yes     | Yes                       | Yes                       | Yes             | F13 (1), F2 (1)                                                                             | M7 (4), M6 (1), M10 (3), M11 (2), M4 (2)                          | M7 (5), M4 (3), M6 (3), M11 (2), M5 (1)                               |
| M3               | DQH      | M   | 5   | Yes     | No                        | Yes                       | No              | M11 (3), M4 (2), M10 (1)                                                                    | F12 (1), F2 (1)                                                   | F12 (1), F1 (1)                                                       |
| M4               | DQO      | M   | 25  | Yes     | Yes                       | Yes                       | Yes             | F12 (1), F2 (1), M12 (1), F1 (2), M7 (2), F13 (2), M5 (1), M6 (1), F11 (1), M10 (1), M2 (1) | M7 (1), M10 (1)                                                   | M7 (1), M2 (1)                                                        |
| M5               | DQH/DQO  | M   | 8   | Yes     | Yes                       | Yes                       | Yes             | M11 (1), M7 (1), M2 (1), M4 (1)                                                             |                                                                   |                                                                       |
| M6               | DQO      | M   | 21  | Yes     | Yes                       | Yes                       | Yes             | F12 (1), F2 (1), M4 (1), M1 (1)                                                             |                                                                   |                                                                       |

|     |     |   |    |     |     |     |     |                 |                                                    |                                                    |
|-----|-----|---|----|-----|-----|-----|-----|-----------------|----------------------------------------------------|----------------------------------------------------|
| M7  | DQO | M | 19 | Yes | Yes | Yes | Yes | M10 (1), M1 (1) | M2 (3), M7 (1), M11 (2),<br>M10 (1), M6 (1)        | M6 (2), M7 (1), M2<br>(2), M5 (1), M4 (2)          |
| M8  | DQB | M | 6  | Yes | No  | No  | No  |                 | F4 (5), F7 (6), F9 (2), F5 (4),<br>F8 (4), F6 (4), | F4 (5), F5 (5), F10 (5),<br>F6 (7), F8 (2), F9 (2) |
| M9  | DQH | M | 4  | Yes | No  | No  | No  |                 | F1 (1), F11 (1), F12 (1), F13<br>(1)               | F1 (2), M5 (1), F13 (1)                            |
| M10 | DQO | M | 22 | Yes | Yes | Yes | Yes |                 | M7 (4), M6 (2), M2 (2), M11<br>(2)                 | M7 (4), M4 (2), M6<br>(2), M2 (1), M5 (1)          |
| M11 | DQO | M | 16 | Yes | Yes | Yes | Yes |                 | F2 (1), F13 (1)                                    | F1 (1), F13 (1)                                    |
| F4  | DQB | F | 27 | No  | No  | Yes | Yes |                 |                                                    |                                                    |
| F5  | DQB | F | 23 | No  | No  | Yes | Yes |                 |                                                    |                                                    |
| F6  | DQB | F | 6  | No  | No  | Yes | Yes |                 |                                                    |                                                    |
| F7  | DQB | F | 6  | No  | No  | Yes | No  |                 |                                                    |                                                    |
| F8  | DQB | F | 13 | No  | No  | Yes | Yes |                 |                                                    |                                                    |
| F9  | DQB | F | 42 | No  | No  | Yes | Yes |                 |                                                    |                                                    |
| F10 | DQB | F | 2  | No  | No  | Yes | Yes |                 |                                                    |                                                    |
| F11 | DQH | F | 31 | No  | Yes | Yes | No  |                 |                                                    |                                                    |
| F12 | DQH | F | 45 | No  | Yes | Yes | Yes |                 |                                                    |                                                    |
| F13 | DQH | F | 16 | No  | Yes | Yes | Yes |                 |                                                    |                                                    |
| M12 | DQH | M | 20 | No  | Yes | No  | No  |                 |                                                    |                                                    |
| F14 | DQH | F | 4  | No  | No  | No  | Yes |                 |                                                    |                                                    |

**Table S2.**

Parameter estimates of generalized linear mixed effects models (GLMMs) testing whether *T. truncatus* produce different behavioural responses to water vs. urine. Sample sizes differ by model and are reported in the formal model descriptions.

| <b>Dolphin responses to water vs. urine</b>     |          |       |                  |          |
|-------------------------------------------------|----------|-------|------------------|----------|
|                                                 | Estimate | SE    | <i>statistic</i> | <i>p</i> |
| <b><u>Model 1. Open mouth sampling</u></b>      |          |       |                  |          |
| Intercept                                       | 0.757    | 0.180 | 4.206            | < 0.001  |
| Treatment: urine                                | 0.764    | 0.177 | 4.323            | < 0.001  |
| Individual (Variance)                           | 0.067    |       |                  |          |
| R <sup>2</sup> marginal                         | 0.127    |       |                  |          |
| R <sup>2</sup> conditional                      | 0.190    |       |                  |          |
| <b><u>Model 2. Whistling</u></b>                |          |       |                  |          |
| Intercept                                       | 2.374    | 1.397 | 1.700            | 0.089    |
| Treatment: urine                                | -0.880   | 0.961 | -0.916           | 0.360    |
| Individual (Variance)                           | 7.28     |       |                  |          |
| R <sup>2</sup> marginal                         | 0.015    |       |                  |          |
| R <sup>2</sup> conditional                      | 0.623    |       |                  |          |
| <b><u>Model 3. Number of whistles</u></b>       |          |       |                  |          |
| Intercept                                       | 0.459    | 0.626 | 0.734            | 0.463    |
| Treatment: urine                                | 0.826    | 0.149 | 5.557            | < 0.001  |
| Individual (Variance)                           | 2.301    |       |                  |          |
| R <sup>2</sup> marginal, non-truncated model    | 0.106    |       |                  |          |
| R <sup>2</sup> conditional, non-truncated model | 0.884    |       |                  |          |
| <b><u>Model 4. Echolocation</u></b>             |          |       |                  |          |
| Intercept                                       | 1.452    | 0.883 | 1.646            | 0.100    |
| Treatment: urine                                | 0.306    | 0.685 | 0.447            | 0.655    |
| Individual (Variance)                           | 2.594    |       |                  |          |
| R <sup>2</sup> marginal                         | 0.003    |       |                  |          |

|                                          |       |       |       |         |
|------------------------------------------|-------|-------|-------|---------|
| R <sup>2</sup> conditional               | 0.326 |       |       |         |
| <b>Model 5. Duration of echolocation</b> |       |       |       |         |
| Intercept                                | 0.981 | 0.242 | 4.059 | < 0.001 |
| Treatment: urine                         | 0.541 | 0.218 | 2.485 | 0.013   |
| Individual (Variance)                    | 0.136 |       |       |         |
| R <sup>2</sup> marginal                  | 0.063 |       |       |         |
| R <sup>2</sup> conditional               | 0.190 |       |       |         |



**Table S3.**

Parameter estimates of generalized linear mixed effects models (GLMMs) testing whether *T. truncatus* produce different behavioural responses to urine from familiar vs. unfamiliar individuals. Sample sizes differ by model and are reported in the formal model descriptions.

| <b>Dolphin responses to familiar vs. unfamiliar urine</b>             |          |       |                  |          |
|-----------------------------------------------------------------------|----------|-------|------------------|----------|
|                                                                       | Estimate | SE    | <i>statistic</i> | <i>p</i> |
| <b>Model 6. Open mouth sampling</b>                                   |          |       |                  |          |
| Intercept                                                             | 0.960    | 0.267 | 3.593            | < 0.001  |
| Familiarity                                                           | 1.119    | 0.179 | 6.237            | < 0.001  |
| Urine sample age                                                      | 0.007    | 0.013 | 0.527            | 0.598    |
| Urine donor sex: male                                                 | -0.319   | 0.276 | -1.153           | 0.249    |
| Individual (Variance)                                                 | 5.6      |       |                  |          |
| R <sup>2</sup> marginal                                               | 0.385    |       |                  |          |
| R <sup>2</sup> conditional                                            | 0.494    |       |                  |          |
| <b>Model 6-CB. Open mouth sampling<br/>(counter-balanced dataset)</b> |          |       |                  |          |
| Intercept                                                             | 0.831    | 0.431 | 1.929            | 0.068    |
| Familiarity                                                           | 1.282    | 0.296 | 4.329            | < 0.001  |
| Urine sample age                                                      | -0.031   | 0.024 | -1.272           | 0.218    |
| Urine donor sex: male                                                 | 0.655    | 0.410 | 1.597            | 0.126    |
| R <sup>2</sup>                                                        | 0.617    |       |                  |          |
| <b>Model 7. Whistling</b>                                             |          |       |                  |          |
| Intercept                                                             | 8.612    | 4.752 | 1.812            | 0.070    |
| Familiarity                                                           | -1.420   | 1.833 | -0.775           | 0.439    |
| Individual (Variance)                                                 | 150.1    |       |                  |          |
| R <sup>2</sup> marginal                                               | 0.001    |       |                  |          |
| R <sup>2</sup> conditional                                            | 0.342    |       |                  |          |
| <b>Model 8. Number of whistles</b>                                    |          |       |                  |          |
| Intercept                                                             | 0.885    | 0.612 | 1.446            | 0.148    |
| Familiarity                                                           | 0.932    | 0.141 | 6.605            | < 0.001  |

|                                                 |        |       |        |         |
|-------------------------------------------------|--------|-------|--------|---------|
| Individual (Variance)                           | 1.784  |       |        |         |
| R <sup>2</sup> marginal, non-truncated model    | 0.136  |       |        |         |
| R <sup>2</sup> conditional, non-truncated model | 0.928  |       |        |         |
| <b>Model 9. Echolocation</b>                    |        |       |        |         |
| Intercept                                       | 2.211  | 1.105 | 2.001  | 0.045   |
| Familiarity                                     | -0.702 | 0.835 | -0.840 | 0.401   |
| Individual (Variance)                           | 2.633  |       |        |         |
| R <sup>2</sup> marginal                         | 0.015  |       |        |         |
| R <sup>2</sup> conditional                      | 0.321  |       |        |         |
| <b>Model 10. Duration of echolocation</b>       |        |       |        |         |
| Intercept                                       | 1.292  | 0.258 | 5.009  | < 0.001 |
| Familiarity                                     | 0.460  | 0.254 | 1.811  | 0.070   |
| Individual (Variance)                           | 0.182  |       |        |         |
| R <sup>2</sup> marginal                         | 0.046  |       |        |         |
| R <sup>2</sup> conditional                      | 0.200  |       |        |         |

**Table S4.**

Parameter estimates of generalized linear mixed effects models (GLMMs) testing whether *T. truncatus* produce different behavioural responses to matched and mismatched cross-modal identity cues. Sample sizes differ by model and are reported in the formal model descriptions.

| <b>Dolphin responses to cross-modal identity cues</b>                |                        |                        |                  |          |
|----------------------------------------------------------------------|------------------------|------------------------|------------------|----------|
|                                                                      | Estimate               | SE                     | <i>statistic</i> | <i>p</i> |
| <b>Model 11. Approach duration</b>                                   |                        |                        |                  |          |
| Intercept                                                            | 2.706                  | 0.240                  | 11.293           | < 0.001  |
| Treatment: matched                                                   | 0.424                  | 0.100                  | 4.229            | < 0.001  |
| Urine sample age                                                     | $9.054 \times 10^{-5}$ | $3.912 \times 10^{-3}$ | 0.023            | 0.982    |
| Urine donor sex                                                      | -0.286                 | 0.303                  | -0.945           | 0.345    |
| Individual (Variance)                                                | 0.117                  |                        |                  |          |
| R <sup>2</sup> marginal                                              | 0.168                  |                        |                  |          |
| R <sup>2</sup> conditional                                           | 0.468                  |                        |                  |          |
| <b>Model 11-CB. Approach duration<br/>(counter-balanced dataset)</b> |                        |                        |                  |          |
| Intercept                                                            | 2.587                  | 0.295                  | 8.758            | < 0.001  |
| Treatment: matched                                                   | 0.391                  | 0.101                  | 3.874            | < 0.001  |
| Urine sample age                                                     | 0.008                  | 0.005                  | 1.617            | 0.106    |
| Urine donor sex                                                      | -0.389                 | 0.497                  | -0.783           | 0.433    |
| Individual (Variance)                                                | 0.112                  |                        |                  |          |
| R <sup>2</sup> marginal                                              | 0.233                  |                        |                  |          |
| R <sup>2</sup> conditional                                           | 0.599                  |                        |                  |          |
| <b>Model 12. Whistling</b>                                           |                        |                        |                  |          |
| Intercept                                                            | 0.566                  | 0.863                  | 0.656            | 0.512    |
| Treatment: matched                                                   | -0.284                 | 0.547                  | -0.518           | 0.604    |
| Individual (Variance)                                                | 4.547                  |                        |                  |          |
| R <sup>2</sup> marginal                                              | 0.002                  |                        |                  |          |
| R <sup>2</sup> conditional                                           | 0.530                  |                        |                  |          |
| <b>Model 13. Number of whistles</b>                                  |                        |                        |                  |          |

|                                                 |         |       |        |         |
|-------------------------------------------------|---------|-------|--------|---------|
| Intercept                                       | 1.197   | 0.585 | 2.047  | 0.041   |
| Treatment: matched                              | -0.036  | 0.113 | -0.319 | 0.750   |
| Individual (Variance)                           | 2.198   |       |        |         |
| R <sup>2</sup> marginal, non-truncated model    | < 0.001 |       |        |         |
| R <sup>2</sup> conditional, non-truncated model | 0.914   |       |        |         |
| <b>Model 14. Echolocation</b>                   |         |       |        |         |
| Intercept                                       | 0.546   | 0.746 | 0.731  | 0.465   |
| Treatment: matched                              | 1.034   | 0.638 | 1.621  | 0.105   |
| Individual (Variance)                           | 2.707   |       |        |         |
| R <sup>2</sup> marginal                         | 0.036   |       |        |         |
| R <sup>2</sup> conditional                      | 0.399   |       |        |         |
| <b>Model 15. Duration of echolocation</b>       |         |       |        |         |
| Intercept                                       | 1.457   | 0.319 | 4.564  | < 0.001 |
| Treatment: matched                              | 0.061   | 0.182 | 0.335  | 0.738   |
| Individual (Variance)                           | 0.364   |       |        |         |
| R <sup>2</sup> marginal                         | 0.001   |       |        |         |
| R <sup>2</sup> conditional                      | 0.394   |       |        |         |
